# Supplementary material
Source: Springer Nature journal article supplement (https://www.springermedizin.de/resource/supplementary/12885_2013_4438_MOESM2_ESM.pdf/9466272)

# Overall Survival

median **10.05** months  
95% CI: 8.67–18.14

Survival Rate

100%  
80%  
60%  
40%  
20%  
0%

upper confidence limit

lower confidence limit

0 6 12 18 24 30 36 42 48

Months

No. at risk 19 14 7 6 4 4 3 1 1

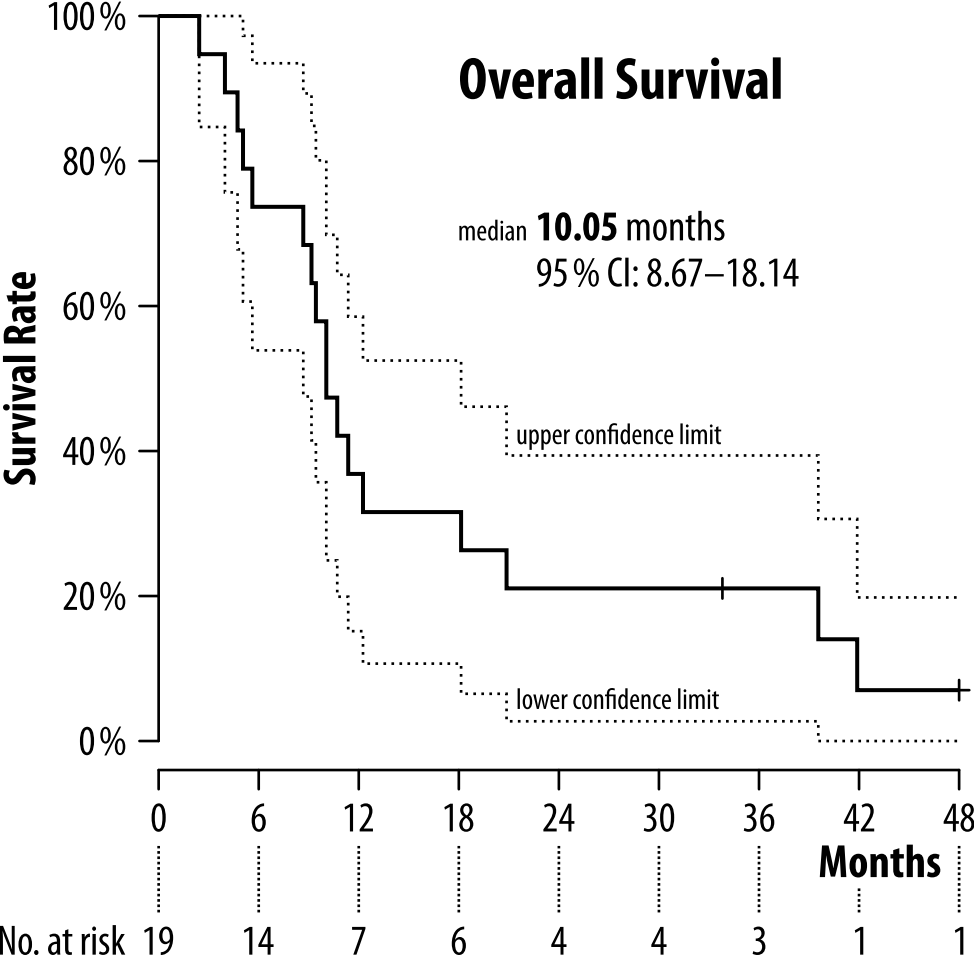

Supplement: MOESM2 [file 9466272]
